# Supplementary material
Source: PubMed Central journal article supplement (PMC6191363)
Supplement: NIHMS960078-supplement-Supp_TableS1.pdf [file NIHMS960078-supplement-Supp_TableS1.pdf]

TABLE S1. Primer and probe sequences for viral load quantitation and m157 plasmid standard.

| Site | Name                           | Forward primer (sense)        | Reverse primer (antisense)   | Probe                                                       |
|------|--------------------------------|-------------------------------|------------------------------|-------------------------------------------------------------|
| A    | MCMV-WT and MCMV $\Delta$ m157 | 5'-ACATCTTTGAGCGTGACTACC-3'   | 5'- GTGCCGTTACCGTAGAATTA-3'  | /56JOEN/CG TCA GTA A/ZEN/C GAT CGC<br>AGA GCT GTT /3IABkFQ/ |
| B    | MCMV-WT only                   | 5'- GCATATCGTACGCAGATCCTT-3'  | 5'-AATCTGTCCGGATGTCAGTTC-3'  | /56FAM/TG TGT GTC C/ZEN/C AGA GAC<br>TTT GTG TCA /3IABkFQ/  |
| C    | m157 standard                  | 5'-CGGTCGGTATTGAATTAGGGTAG-3' | 5'-CGTCCGTCTCTGTAGAGGATAA-3' | n/a                                                         |
